# Supplementary material for: Non-Genomic Control of Dynamic MYCN Gene Expression in Liver Cancer
Source: PubMed Central journal article supplement (PMC8085327; doi:10.3389/fonc.2020.618515), 2021-04-16
Supplement: Image_1.pdf [file Image_1.pdf]

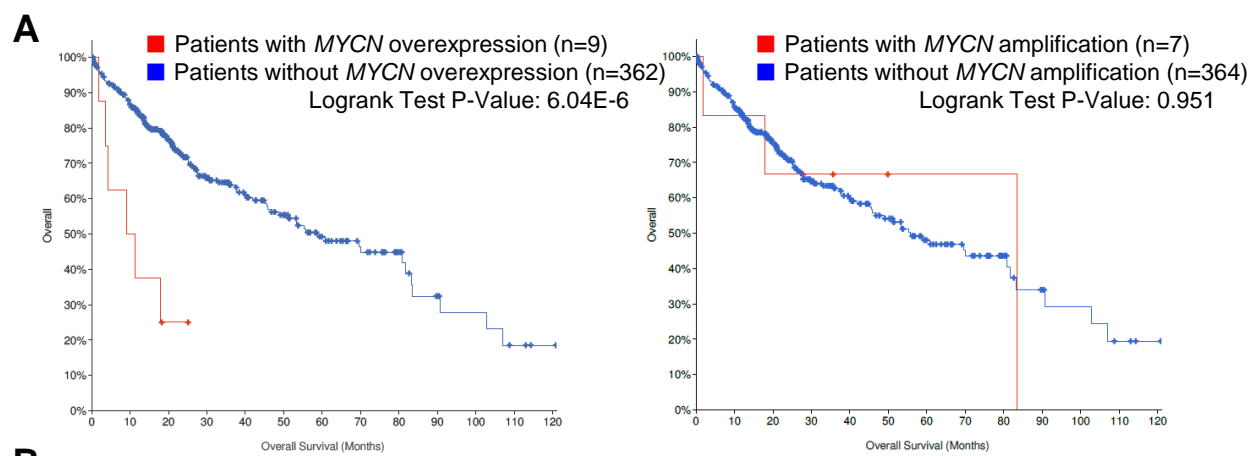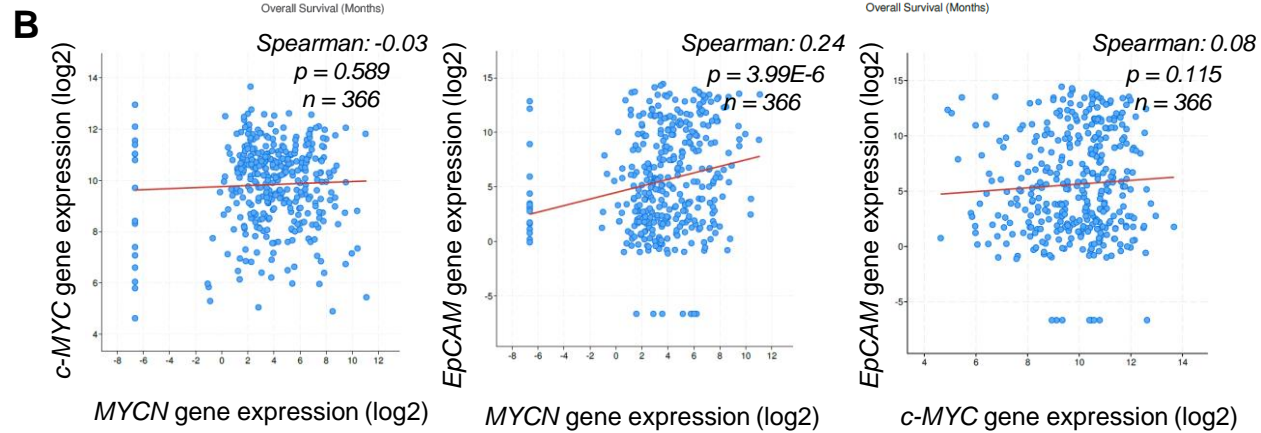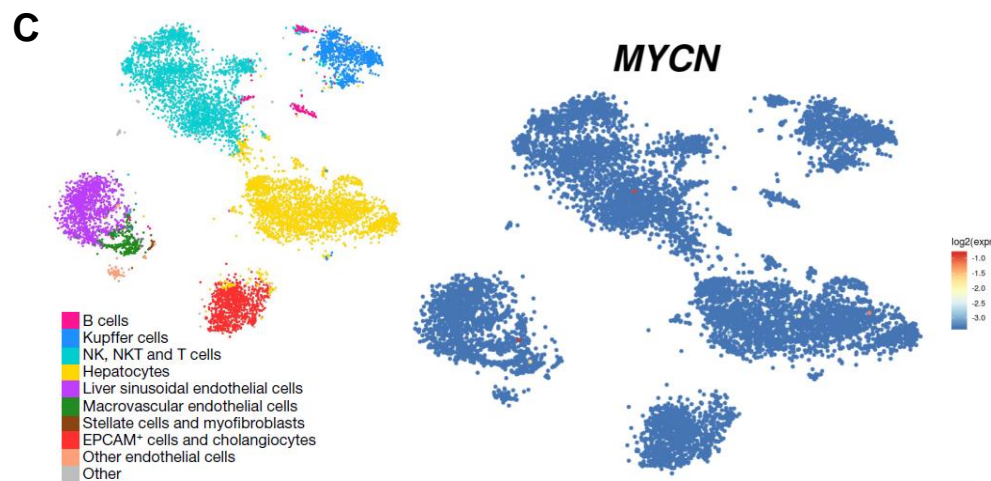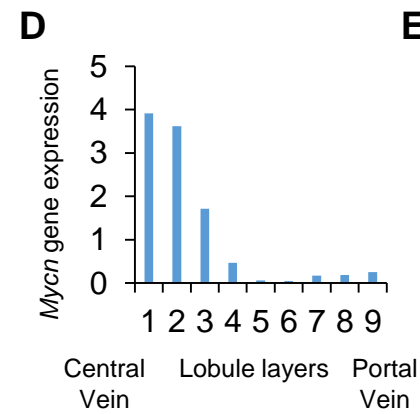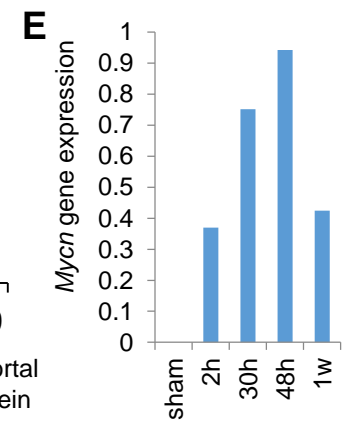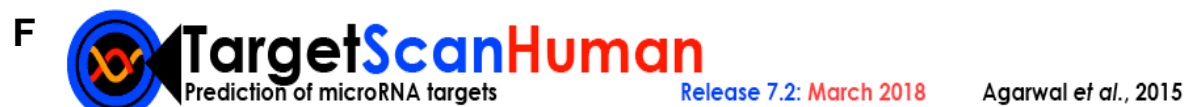

Human MYCN ENST00000281043.3 3' UTR length: 917

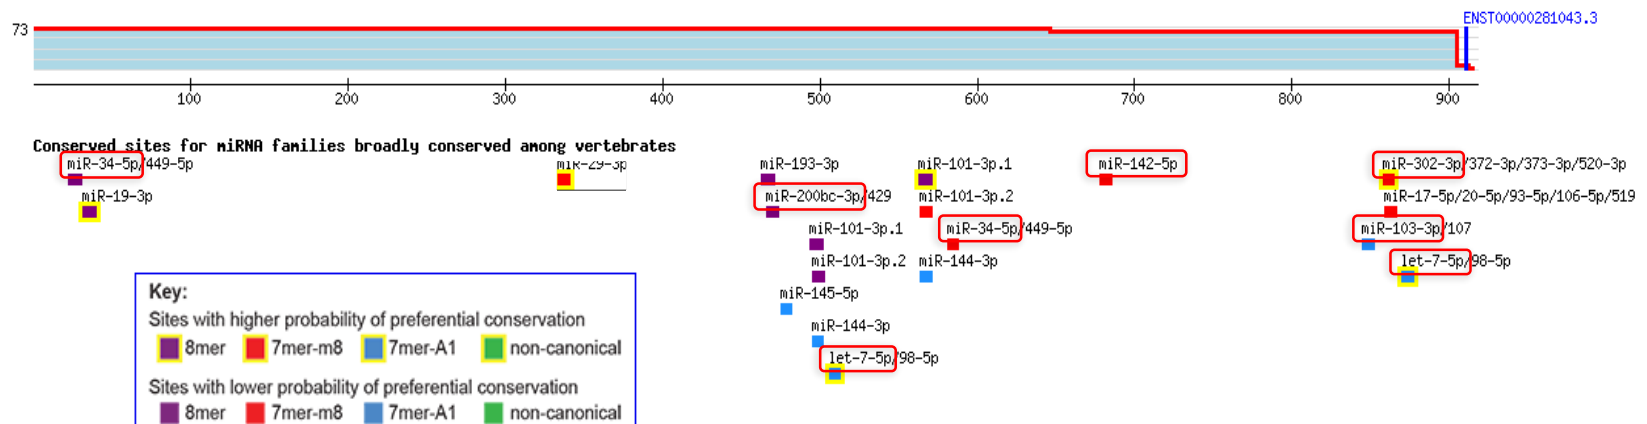

**Fig. S1**
